# Supplementary material for: First Report of the Emergence of Peste des Petits Ruminants Lineage IV Virus in Senegal
Source: MDPI journal article supplement (doi:10.3390/v16020305), 2024-02-17
Supplement: s1 [file s1]

**Table S1: RT-qPCR results for the samples analysed**

| <b>Number of order</b> | <b>Nature of sample</b>    | <b>Cq values</b> | <b>Sample status</b> |
|------------------------|----------------------------|------------------|----------------------|
| 1                      | Oral and nasal Swab        | NA               | Negative             |
| 2                      | Oral and nasal Swab        | 23.99            | Positive             |
| 3                      | Oral and nasal Swab        | 25.50            | Positive             |
| 4                      | Oral and nasal Swab        | 28.70            | Positive             |
| <b>5</b>               | <b>Oral and nasal Swab</b> | <b>18.38</b>     | <b>Positive</b>      |
| 6                      | Oral and nasal Swab        | 28.81            | Positive             |
| 7                      | Oral and nasal Swab        | 22.63            | Positive             |
| 8                      | Anal Swab                  | NA               | Negative             |
| 9                      | Anal Swab                  | 25.20            | Positive             |
| 10                     | Anal Swab                  | 19.34            | Positif              |
